# Supplementary material for: Reflectance Spectroscopy for the Classification and Prediction of Pigments in Agronomic Crops
Source: MDPI journal article supplement (doi:10.3390/plants12122347), 2023-06-16
Supplement: s1 [file s1]

# Reflectance Spectroscopy for the Classification and Prediction of Pigments in Agronomic Crops

Renan Falcioni <sup>1,\*</sup>, Werner Camargos Antunes <sup>1</sup>, José Alexandre M. Demattê <sup>2</sup> and Marcos Rafael Nanni <sup>1</sup>

<sup>1</sup> Graduate Program in Agronomy, Department of Agronomy, State University of Maringá, Av. Colombo, 5790, Maringá 87020-900, PR, Brazil; wcantunes@uem.br (W.C.A.); mrnanni@uem.br (M.R.N.)

<sup>2</sup> Department of Soil Science, Luiz de Queiroz College of Agriculture, University of São Paulo, Av. Pádua Dias, 11, Piracicaba 13418-260, SP, Brazil; jamdemat@usp.br

\* Correspondence: renanfalcioni@gmail.com; Tel.: +55-44-3011-8940

**Table S1.** Vegetation indexes calculated from the hyperspectral reflectance of leaves.

| Index                                                             | Equation                                    | Reference |
|-------------------------------------------------------------------|---------------------------------------------|-----------|
| NDVI <sub>750</sub> = Normalized Difference Vegetation Index q750 | $(R_{750} - R_{705}) / (R_{750} + R_{705})$ | [52]      |
| WBI = Water Band Index                                            | $(R_{900}) / (R_{970})$                     | [53]      |
| RARS = Ratio Analysis of Reflectance Spectra                      | $(R_{746}) / (R_{513})$                     | [53]      |
| ARI1 = Anthocyanin Reflectance Index                              | $(1/R_{550}) - (1/R_{700})$                 | [54]      |
| PSND = Pigment Specific Normalized Difference                     | $(R_{800} - R_{470}) / (R_{800} + R_{470})$ | [55]      |
| SIPI = Structurally Insensitive Pigment Index                     | $(R_{800} - R_{445}) / (R_{800} - R_{680})$ | [55]      |
| PSRI = Plant Senescence Reflectance Index                         | $(R_{680} - R_{500}) / (R_{750})$           | [56]      |
| PSRI2 = Plant Senescence Reflectance Index 2                      | $(R_{672}) / (R_{550} + R_{708})$           | [56]      |
| PSSRc = Pigment-specific Simple Ratio                             | $(R_{800}) / (R_{500})$                     | [55]      |
| VOG1 = Vogelmann Index 1                                          | $(R_{740}) / (R_{720})$                     | [57]      |
| VOG2 = Vogelmann Index 2                                          | $(R_{734} - R_{747}) / (R_{715} + R_{726})$ | [58]      |
| MSI = Moisture Stress Index                                       | $(R_{1650} / R_{830})$                      | [59]      |
| PRI = Photochemical Reflectance Index                             | $(R_{530} - R_{570}) / (R_{530} + R_{570})$ | [60]      |
| PVR = Normalized Difference Photosynthetic                        | $(R_{550} - R_{650}) / (R_{550} + R_{650})$ | [61]      |
| FR = Fluorescence Ratio                                           | $(R_{690}) / (R_{740})$                     | [62]      |

**Table S2.** Descriptive analysis of pigment attribute-based area and mass. ( $n = 360$ ).

| Attributes                   | Count (n) | Mean  | Median | Minimum | Maximum | CV (%) |
|------------------------------|-----------|-------|--------|---------|---------|--------|
| Chla (mg m <sup>-2</sup> )   | 360       | 330.6 | 329.6  | 136.9   | 713.0   | 42.2   |
| Chlb (mg m <sup>-2</sup> )   | 360       | 210.1 | 154.2  | 61.0    | 994.4   | 69.7   |
| Chla+b (mg m <sup>-2</sup> ) | 360       | 540.7 | 475.5  | 197.9   | 1707.4  | 51.1   |
| Car (mg m <sup>-2</sup> )    | 360       | 122.3 | 116.6  | 52.4    | 287.8   | 41.3   |
| AnC (nmol m <sup>-2</sup> )  | 360       | 0.9   | 0.8    | 0.1     | 2.1     | 65.2   |
| Flv (nmol m <sup>-2</sup> )  | 360       | 73.4  | 68.9   | 15.8    | 116.8   | 37.1   |
| Chla (mg g <sup>-1</sup> )   | 360       | 7.0   | 6.0    | 1.9     | 29.6    | 73.8   |
| Chlb (mg g <sup>-1</sup> )   | 360       | 4.1   | 3.5    | 1.0     | 14.1    | 62.6   |
| Chla+b (mg g <sup>-1</sup> ) | 360       | 11.1  | 9.7    | 3.1     | 41.1    | 66.6   |
| Car (mg g <sup>-1</sup> )    | 360       | 2.5   | 2.3    | 0.7     | 9.4     | 61.3   |
| AnC (μmol g <sup>-1</sup> )  | 360       | 0.2   | 0.1    | 0.0     | 0.7     | 93.4   |
| Flv (μmol g <sup>-1</sup> )  | 360       | 11.9  | 11.3   | 3.5     | 20.4    | 33.4   |

**Table S3.** Simultaneous PLSR statistical models obtained by calibration and cross-validation phase by pigments for corn, sugarcane, coffee, canola, wheat, and tobacco crops. Model goodness-of-fit ( $R^2$ ), offset, root mean square error (RMSE), ratio of performance to deviation (RPD), and bias parameters from UV-VIS-NIR-SWIR hyperspectral data. Abbreviation for attributes were indicate material and methods sections.

| PLSR Models      | Attributes                     | PLSR Parameters |       |        |       |     |      |
|------------------|--------------------------------|-----------------|-------|--------|-------|-----|------|
|                  |                                | $r$             | $R^2$ | Offset | RMSE  | RPD | Bias |
| Calibration      | Chla ( $\text{mg m}^{-2}$ )    | 0.92            | 0.85  | 48.8   | 54.3  | 2.6 | –    |
|                  | Chlb ( $\text{mg m}^{-2}$ )    | 0.91            | 0.83  | 33.3   | 51.3  | 2.4 | –    |
|                  | Chla+b ( $\text{mg m}^{-2}$ )  | 0.90            | 0.81  | 97.7   | 111.7 | 2.3 | –    |
|                  | Car ( $\text{mg m}^{-2}$ )     | 0.93            | 0.87  | 16.0   | 18.2  | 2.7 | –    |
|                  | AnC ( $\text{nmol m}^{-2}$ )   | 0.93            | 0.87  | 0.1    | 0.2   | 2.8 | –    |
|                  | Flv ( $\text{nmol m}^{-2}$ )   | 0.92            | 0.84  | 11.6   | 10.5  | 2.5 | –    |
|                  | Chla ( $\text{mg g}^{-1}$ )    | 0.90            | 0.81  | 1.4    | 2.4   | 2.3 | –    |
|                  | Chlb ( $\text{mg g}^{-1}$ )    | 0.88            | 0.78  | 1.3    | 1.4   | 2.1 | –    |
|                  | Chla+b ( $\text{mg g}^{-1}$ )  | 0.88            | 0.77  | 2.6    | 3.6   | 2.1 | –    |
|                  | Car ( $\text{mg g}^{-1}$ )     | 0.89            | 0.79  | 0.5    | 0.8   | 2.2 | –    |
|                  | AnC ( $\mu\text{mol g}^{-1}$ ) | 0.94            | 0.89  | 0.0    | 0.1   | 3.0 | –    |
|                  | Flv ( $\mu\text{mol g}^{-1}$ ) | 0.89            | 0.80  | 2.4    | 1.7   | 2.2 | –    |
| Cross-Validation | Chla ( $\text{mg m}^{-2}$ )    | 0.92            | 0.85  | 50.3   | 56.8  | 2.5 | –    |
|                  | Chlb ( $\text{mg m}^{-2}$ )    | 0.90            | 0.82  | 34.8   | 54.2  | 2.3 | –    |
|                  | Chla+b ( $\text{mg m}^{-2}$ )  | 0.90            | 0.81  | 99.9   | 114.4 | 2.3 | –    |
|                  | Car ( $\text{mg m}^{-2}$ )     | 0.93            | 0.86  | 16.0   | 18.8  | 2.7 | –    |
|                  | AnC ( $\text{nmol m}^{-2}$ )   | 0.93            | 0.87  | 0.1    | 0.2   | 2.7 | –    |
|                  | Flv ( $\text{nmol m}^{-2}$ )   | 0.92            | 0.85  | 12.2   | 10.9  | 2.6 | –    |
|                  | Chla ( $\text{mg g}^{-1}$ )    | 0.88            | 0.78  | 1.6    | 2.5   | 2.1 | –    |
|                  | Chlb ( $\text{mg g}^{-1}$ )    | 0.88            | 0.78  | 1.4    | 1.5   | 2.1 | –    |
|                  | Chla+b ( $\text{mg g}^{-1}$ )  | 0.88            | 0.77  | 2.6    | 3.8   | 2.1 | –    |
|                  | Car ( $\text{mg g}^{-1}$ )     | 0.88            | 0.77  | 0.6    | 0.7   | 2.1 | –    |
|                  | AnC ( $\mu\text{mol g}^{-1}$ ) | 0.94            | 0.88  | 0.0    | 0.0   | 2.9 | –    |
|                  | Flv ( $\mu\text{mol g}^{-1}$ ) | 0.89            | 0.79  | 2.5    | 1.7   | 2.2 | –    |

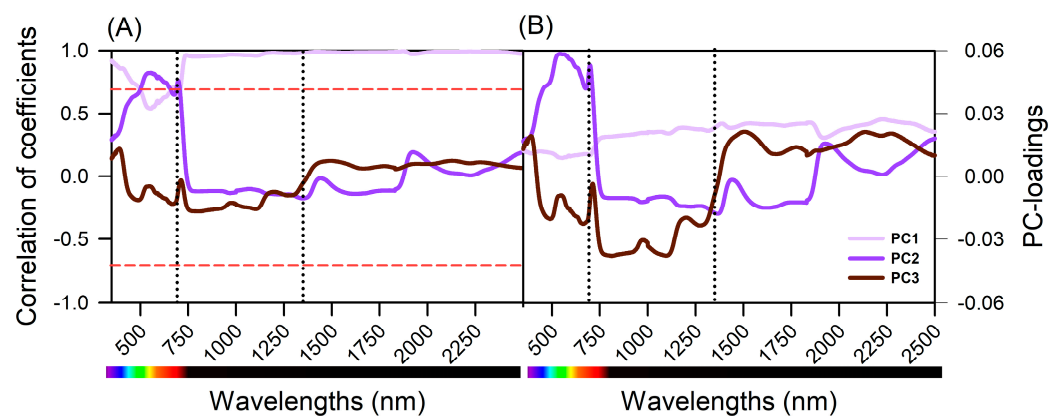

**Figure S1.** (A) Correlation coefficients and (B) PC loadings in the 350–2500 nm range, represented by light to dark purple lines for PC1, PC2, and PC3, respectively. The red line indicates the  $-0.70$  to  $+0.70$  correlation range, with dots marking the 700 and 1300 nm delimitations.

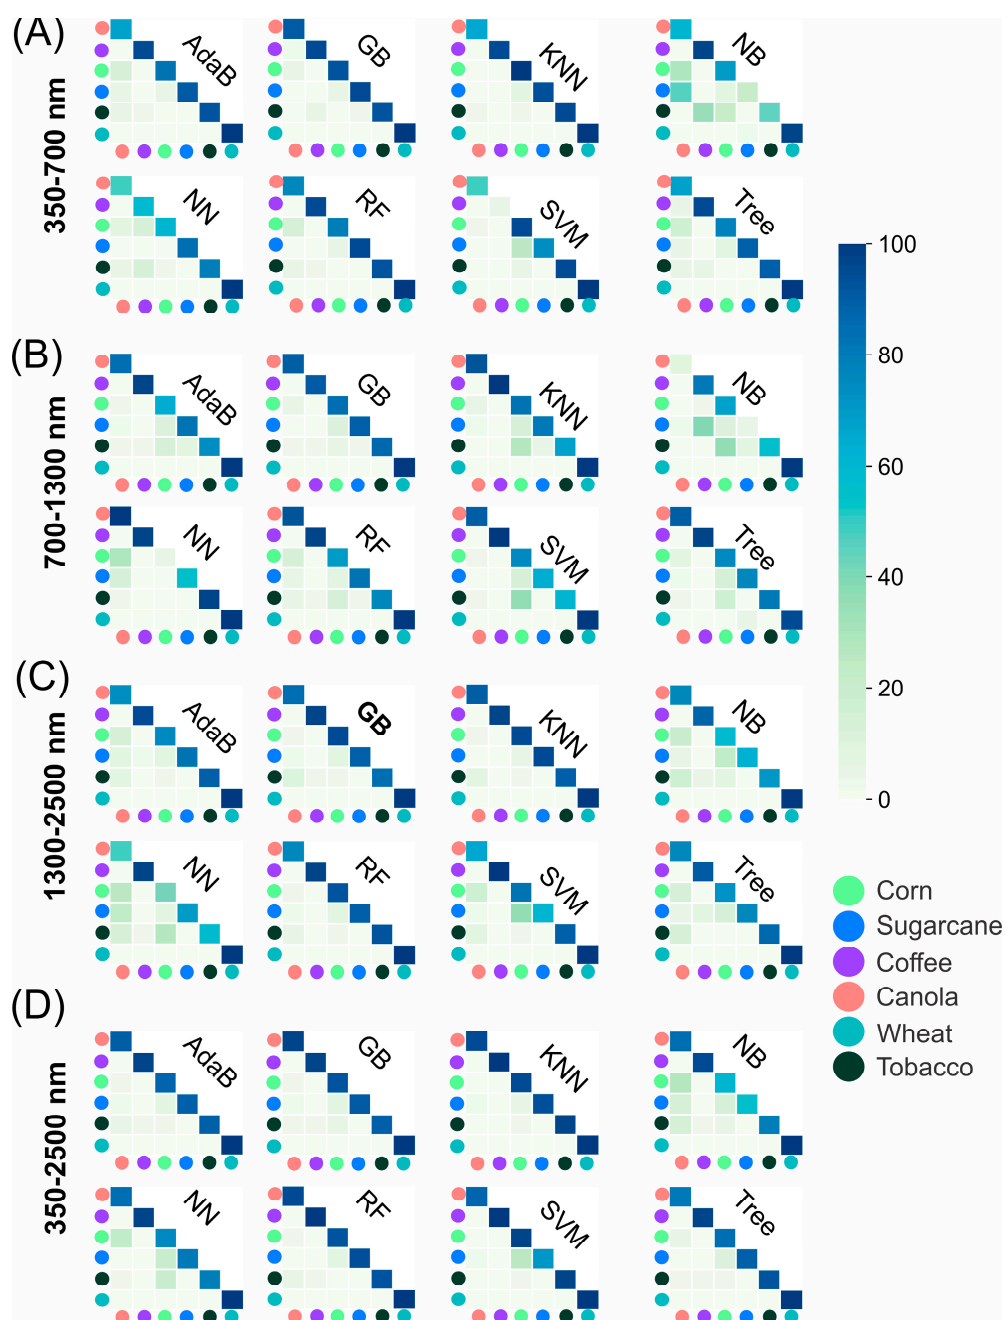

**Figure S2.** Matrix of correlation displayed accept and error frequency by model-based UV-VIS-NIR-SWIR comprising reflectance data to corn, sugarcane, coffee, canola, wheat, and tobacco plants. (A) 350–700 nm; (B) 700–1300 nm; (C) 1300–2500 nm; (D) 350–2500 nm. The correlation model test (frequency number) indicated a maximum simulation to correct classification-based independent data (scale 0 at 100; light green to dark blue). Abbreviation for models were indicate material and methods sections.

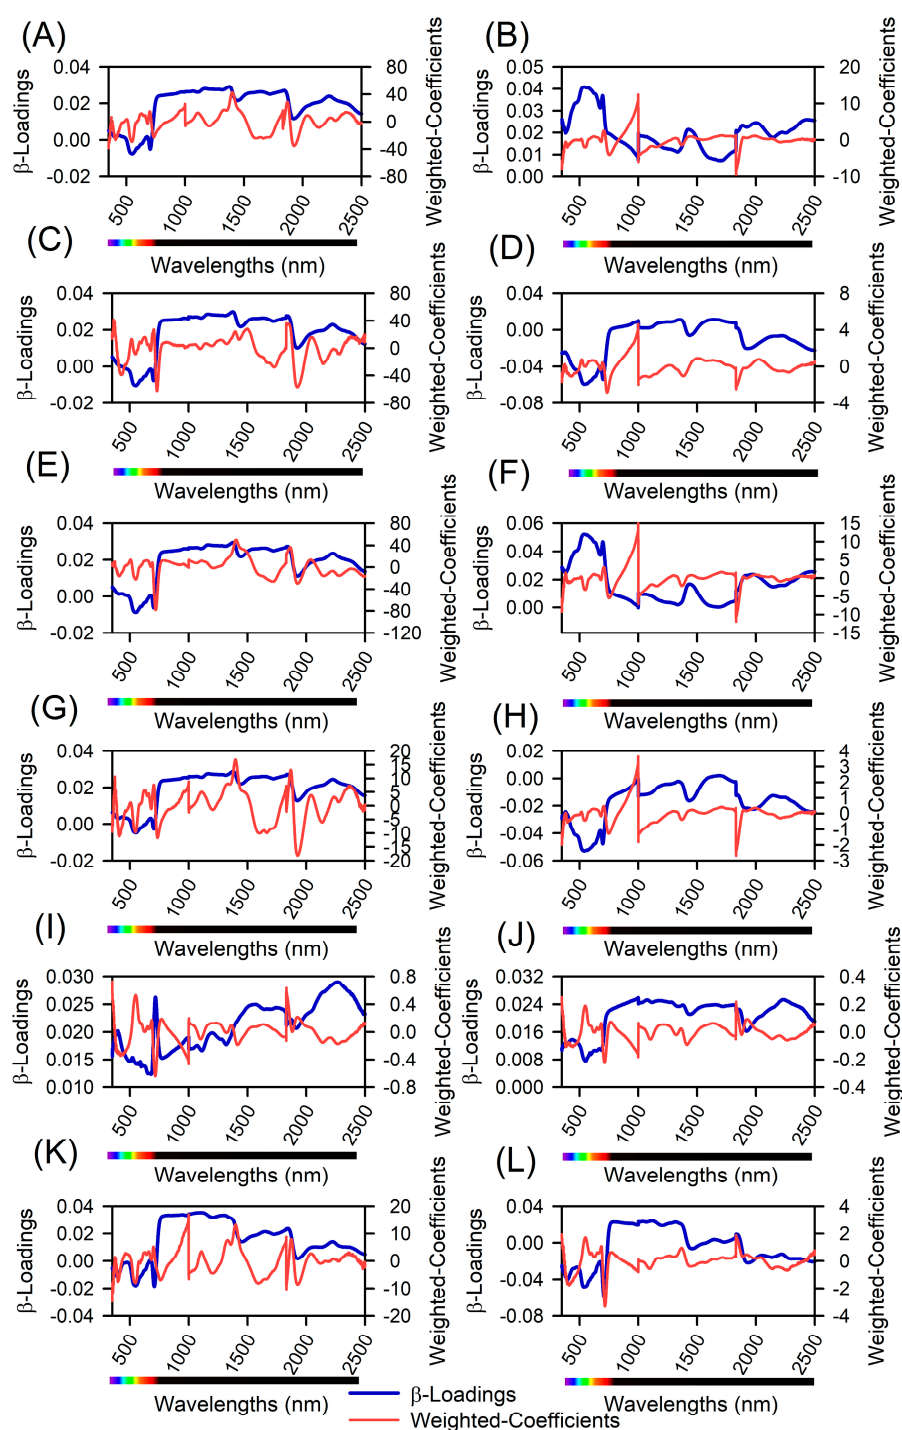

**Figure S3.**  $\beta$ -loadings and weighted-coefficients predicted PLSR method-based UV-VIS-NIR-SWIR hyperspectral data. (A) Chlorophyll *a* (Chl*a*; mg m<sup>-2</sup>); (B) Chlorophyll *b* (Chl*b*; mg m<sup>-2</sup>); (C) Chlorophyll *a+b* (Chl*a+b*; mg m<sup>-2</sup>); (D) Carotenoids (Car; mg m<sup>-2</sup>); (E) Anthocyanins (AnC; nmol cm<sup>-2</sup>); (F) Flavonoids (Flv; nmol cm<sup>-2</sup>); (G) Chlorophyll *a* (Chl*a*; mg g<sup>-1</sup>); (H) Chlorophyll *b* (Chl*b*; mg g<sup>-1</sup>); (I) Chlorophyll *a+b* (Chl*a+b*; mg g<sup>-1</sup>); (J) Carotenoids (Car; mg g<sup>-1</sup>); (K) Anthocyanins (AnC;  $\mu$ mol g<sup>-1</sup>); (L) Flavonoids (Flv;  $\mu$ mol g<sup>-1</sup>). Blue line ( $\beta$ -loadings) and red line (weighted-coefficients).

## References

52. Gitelson, A.; Merzlyak, M.N. Spectral Reflectance Changes Associated with Autumn Senescence of *Aesculus hippocastanum* L. and *Acer platanoides* L. Leaves. Spectral Features and Relation to Chlorophyll Estimation. *J. Plant Physiol.* **1994**, *143*, 286–292.
53. Stimson, H.C.; Breshears, D.D.; Ustin, S.L.; Kefauver, S.C. Spectral Sensing of Foliar Water Conditions in Two Co-Occurring Conifer Species: *Pinus edulis* and *Juniperus monosperma*. *Remote Sens. Environ.* **2005**, *96*, 108–118.
54. Lichtenthaler, H.K. Vegetation Stress: An Introduction to the Stress Concept in Plants. *J. Plant Physiol.* **1996**, *148*, 4–14.
55. Chappelle, E.W.; Kim, M.S.; McMurtrey, J.E. Ratio Analysis of Reflectance Spectra (RARS): An Algorithm for the Remote Estimation of the Concentrations of Chlorophyll A, Chlorophyll B, and Carotenoids in Soybean Leaves. *Remote Sens. Environ.* **1992**, *39*, 239–247.
56. Gitelson, A.A.; Zur, Y.; Chivkunova, O.B.; Merzlyak, M.N. Assessing Carotenoid Content in Plant Leaves with Reflectance Spectroscopy. *Photochem. Photobiol.* **2002**, *75*, 272.
57. Blackburn, G.A. Spectral Indices for Estimating Photosynthetic Pigment Concentrations: A Test Using Senescent Tree Leaves. *Int. J. Remote Sens.* **1998**, *19*, 657–675.
58. Merzlyak, M.N.; Gitelson, A.A.; Chivkunova, O.B.; Rakitin, V.Y.U. Non-Destructive Optical Detection of Pigment Changes during Leaf Senescence and Fruit Ripening. *Physiol. Plant.* **1999**, *106*, 135–141.
59. Vogelmann, J.E.; Rock, B.N.; Moss, D.M. Red Edge Spectral Measurements from Sugar Maple Leaves. *Int. J. Remote Sens.* **1993**, *14*, 1563–1575.
60. Hunt, E.R.; Rock, B.N. Detection of Changes in Leaf Water Content Using Near- and Middle-Infrared Reflectances. *Remote Sens. Environ.* **1989**, *30*, 43–54.
61. Peñuelas, J.; Filella, I.; Gamon, J.A. Assessment of Photosynthetic Radiation-Use Efficiency with Spectral Reflectance. *New Phytol.* **1995**, *131*, 291–296.
62. Metternicht, G. Vegetation Indices Derived from High-Resolution Airborne Videography for Precision Crop Management. *Int. J. Remote Sens.* **2003**, *24*, 2855–2877.
